# Supplementary material for: Amyloid‐β activates NLRP3 inflammasomes by affecting microglial immunometabolism through the Syk‐AMPK pathway
Source: PubMed Central journal article supplement (PMC9124305; doi:10.1111/acel.13623), 2022-04-27
Supplement: ACEL-21-e13623-s003.pdf [file ACEL-21-e13623-s003.pdf]

Supplementary information to

**Amyloid- $\beta$  activates NLRP3 inflammasomes by affecting microglial immunometabolism through the Syk-AMPK pathway**

Eun Sun Jung, Kyujin Suh, Jihui Han, Heyyoung Kim, Kyung-Sik Kang, Won-Seok Choi, Inhee Mook-Jung

**Suppl. Figure 1.** R406, syk inhibitor, protects A $\beta$ 42-induced inflammasome activation in LPS-primed microglia.

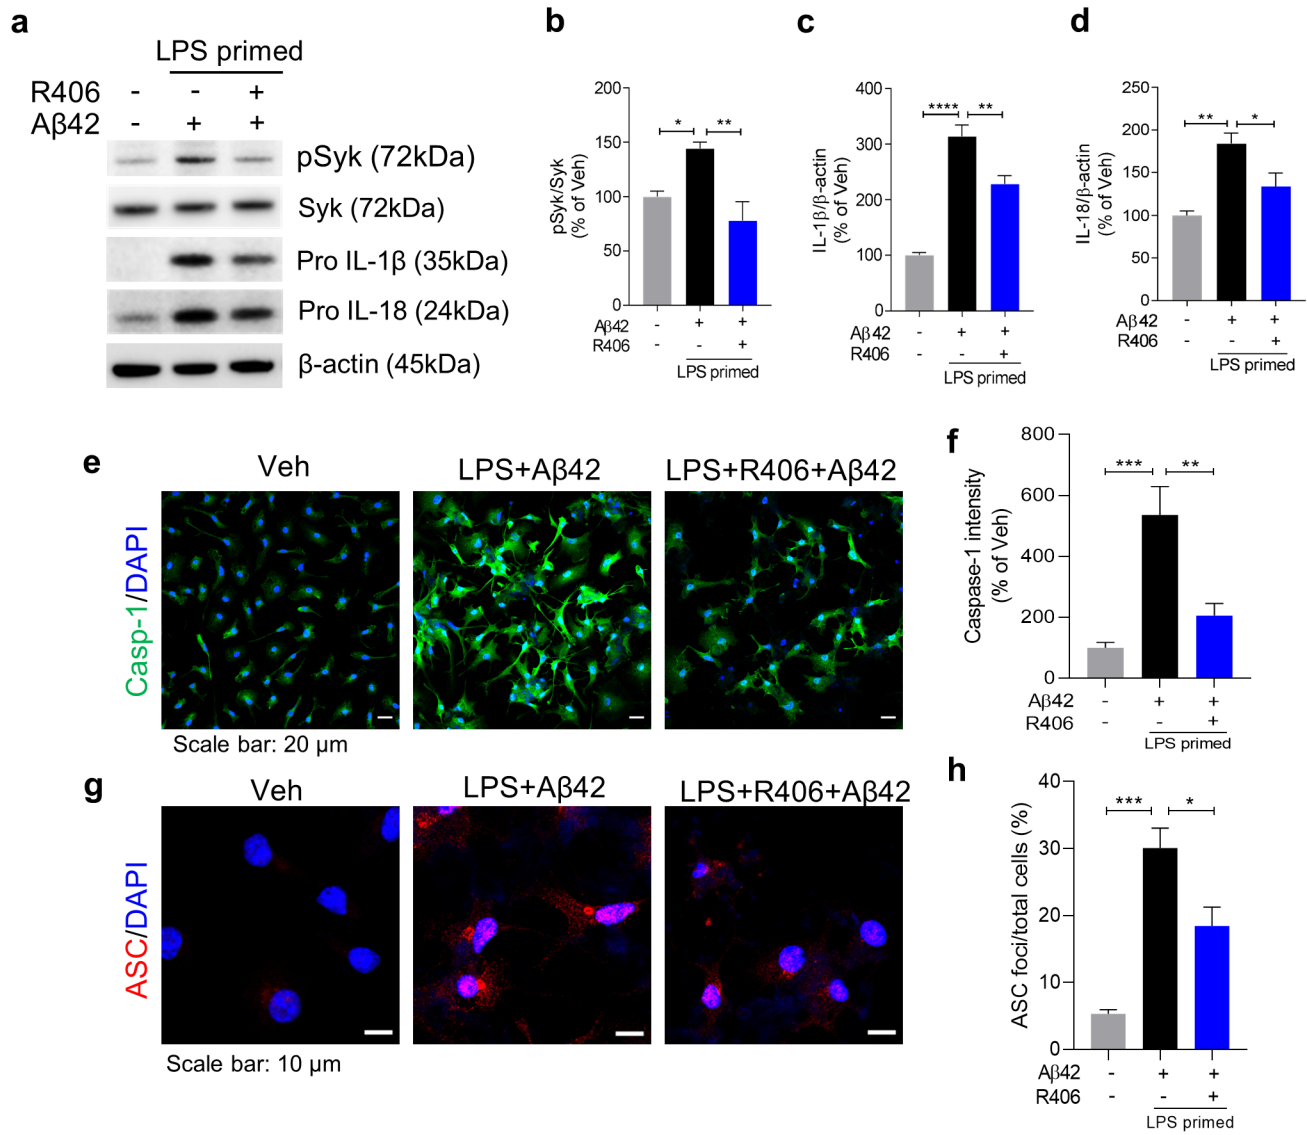

**Suppl. Figure 1. R406, Syk inhibitor, protects A $\beta$ 42-induced inflammasome activation in LPS-primed microglia.** LPS-primed microglia were pre-treated with Syk inhibitor R406 for 1 h followed by treatment with A $\beta$ 42 for 24 h. **(a-d)** Representative image and quantification of western blot for the pSyk, Syk, pro IL-1 $\beta$ , IL-18 and  $\beta$ -actin. **(e and f)** Representative immunofluorescence image of primary microglia with anti-caspase-1 (green) and quantification of immunofluorescence of caspase-1. Scale bar: 20 $\mu$ m. **(g and h)** Immunofluorescence staining for ASC (red) speck. Scale bar: 10 $\mu$ m. Percentages of microglia containing ASC foci was quantified. All data are represented with mean  $\pm$  SEM and analyzed by one-way ANOVA Tukey's multiple comparisons test. (n=4). \*p < 0.05, \*\*p < 0.01, \*\*\*p < 0.001, and \*\*\*\*p < 0.0001.

**Suppl. Figure 2.** Bay inhibits A $\beta$ 42-induced mitochondrial fission in LPS-primed microglia.

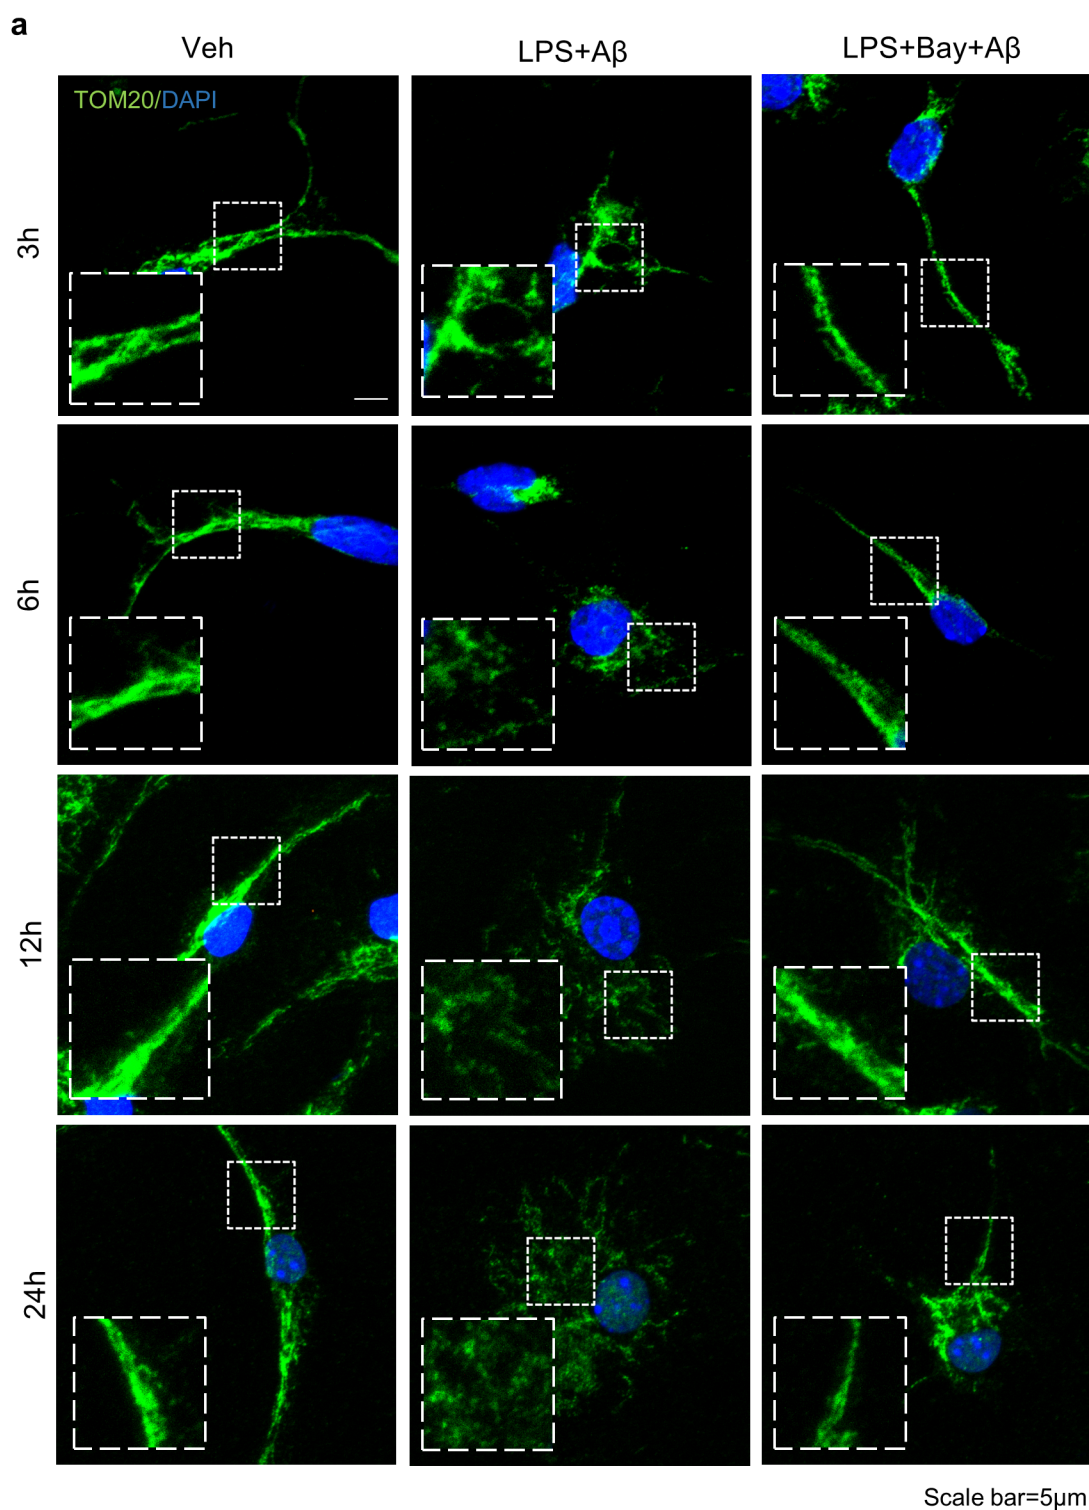

**Suppl. Figure 2. Bay inhibits A $\beta$ 42-induced mitochondrial fission in LPS-primed microglia.** LPS-primed microglia were pre-treated with Bay 61-3606 for 1 h followed by treatment with A $\beta$ 42 for 24 h. Cells were used for ICC at 3, 6, 12 and 24 h post A $\beta$ 42 treatment and immunostained against TOM20. **(a)** Representative images of mitochondrial morphology showing the effect of Bay 61-3606. Mitochondria and nuclei were stained with Tom20 (green) and DAPI (blue), respectively. Scale bar: 5 $\mu$ m.

**Suppl. Figure 3.** Mdivi-1 inhibits A $\beta$ 42-induced mitochondrial fission in LPS-primed microglia.

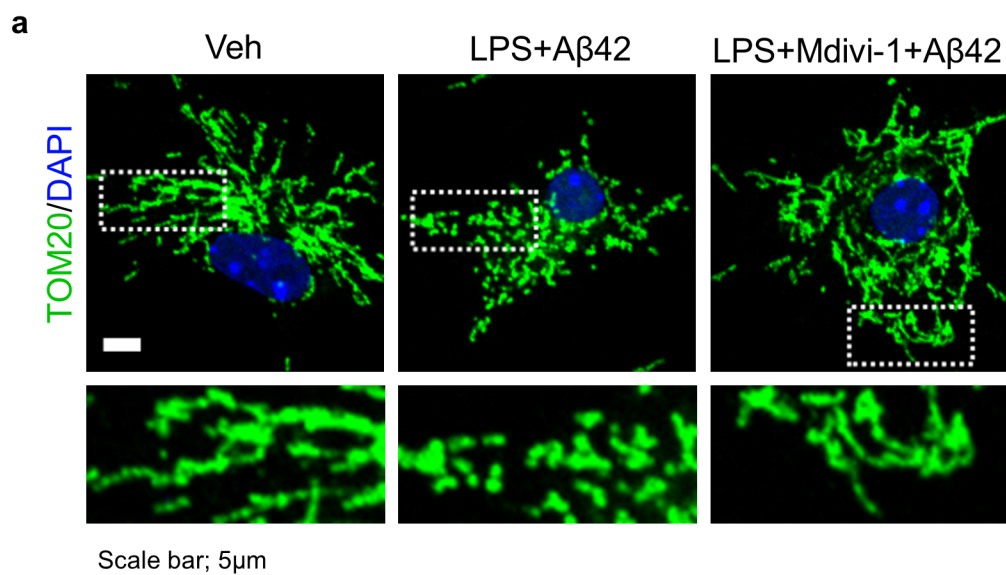

**Suppl. Figure 3. Mdivi-1 inhibits A $\beta$ 42-induced mitochondrial fission in LPS-primed microglia.** LPS-primed microglia were pre-treated with Mdivi-1, a selective mitochondrial division inhibitor, for 1 h followed by treatment with A $\beta$ 42 for 24 h. **(a)** Representative images of mitochondrial morphology showing the effect of Mdivi-1. Mitochondria and nuclei were stained with Tom20 (green) and DAPI (blue). Scale bar: 5 $\mu$ m.

**Suppl. Figure 4.** Flufenamic acid inhibits LPS-induced microglial inflammasome activation and restores altered AKT/AMPK signaling.

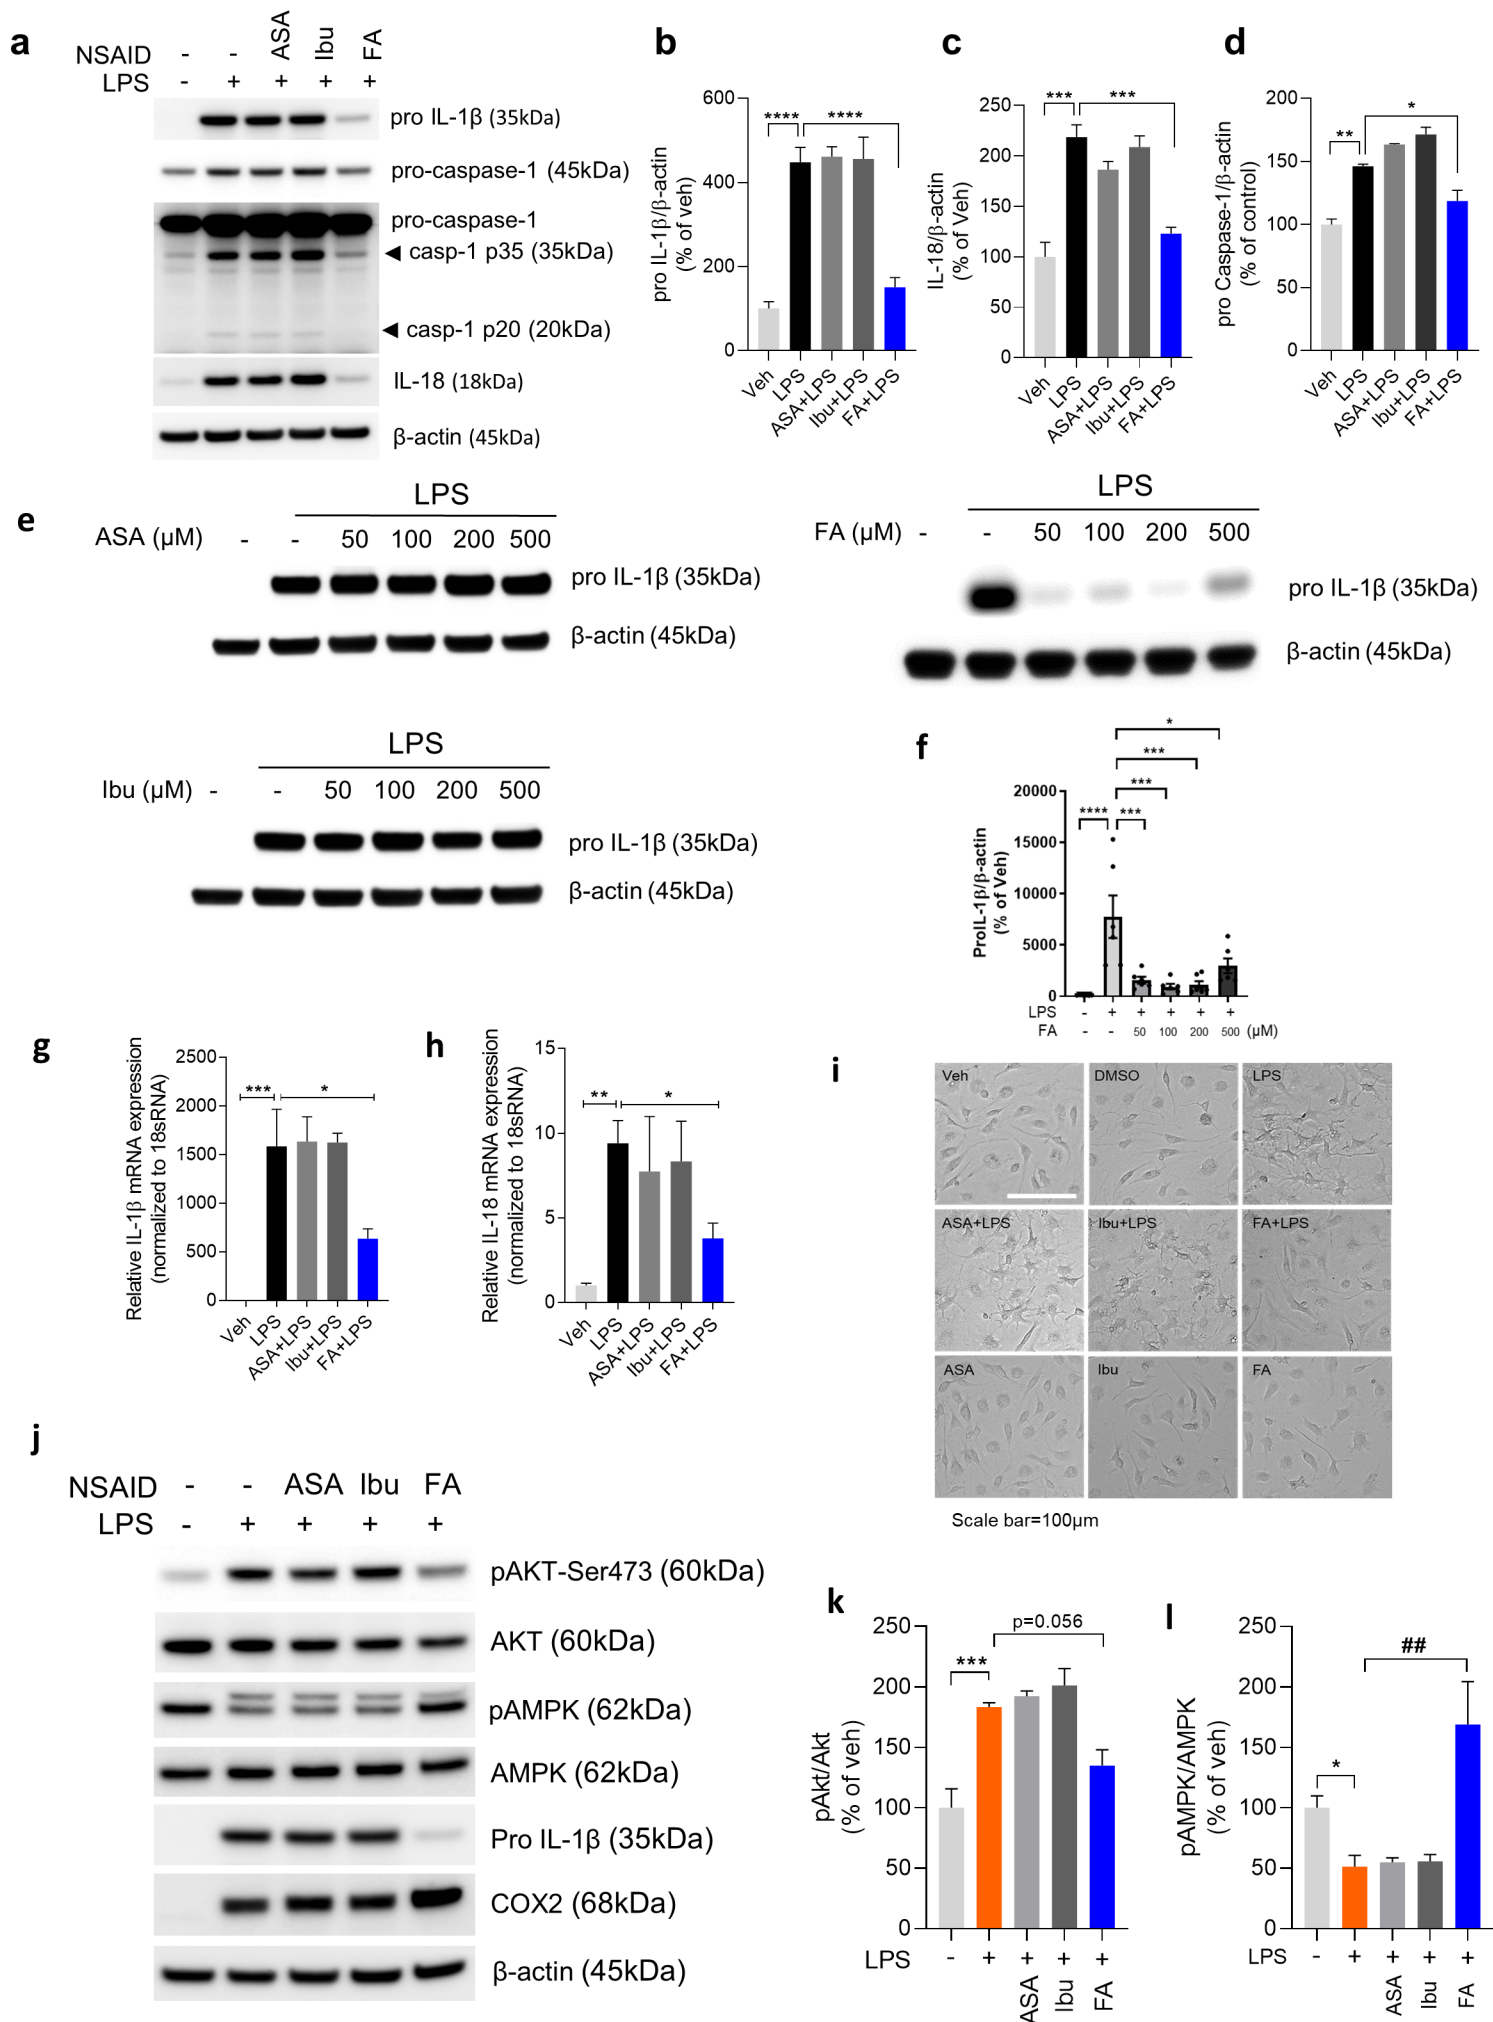



**Suppl. Figure 4. Flufenamic acid inhibits A $\beta$ 42-induced microglial inflammasome activation and restores altered Akt/AMPK signaling.** Primary microglia were pre-treated with acetylsalicylic acid (ASA) or ibuprofen (Ibu) or flufenamic acid (FA) for 1 h at concentration of 100  $\mu$ M followed by treatment with LPS (10 ng/ml) for 24 h. **(a-d)** Whole protein lysates were analyzed for pro IL-1 $\beta$ , pro IL-18, Caspase-1 and  $\beta$ -actin. **(e)** Primary microglia were pre-treated with different concentrations of ASA, ibuprofen or FA for 1 h followed by treatment with LPS (10 ng/ml) for 24 h. The expressions of pro IL-1 $\beta$  protein were determined by western blot. **(f)** Quantification of western blot for FA-pretreated set. **(g and h)** IL-1 $\beta$  and IL-18 mRNA expressions were analyzed using real-time PCR. 18S rRNA was used for normalization. **(i)** Microglia morphology was examined under phase contrast microscope. **(j-l)** Primary microglia were pre-treated with NSAIDs (100  $\mu$ M) for 1 hr followed by treatment with LPS (10 ng/ml) for 24 h. Protein levels of phospho-Akt (Ser723), total Akt, phospho-AMPK(T1722448), total AMPK, pro IL-1 $\beta$ , COX2, and actin were measured by western blot. All data are represented with mean  $\pm$  SEM and analyzed by one-way ANOVA Tukey's multiple comparisons test. (n=2-4). \*p < 0.05, \*\*p < 0.01, \*\*\*p < 0.001, and \*\*\*\*p < 0.0001.

**Suppl. Figure 5.** Flufenamic acid attenuates A $\beta$ 42-induced inflammasome activation in LPS-primed microglia.

**a**

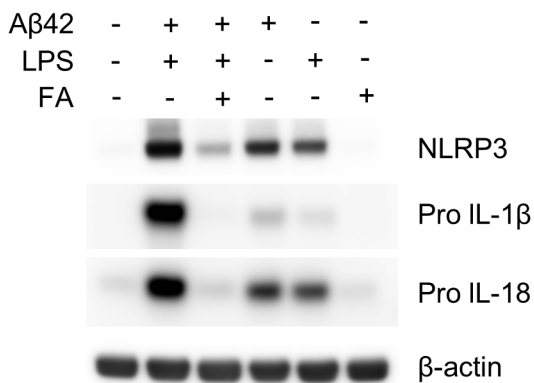

**b**

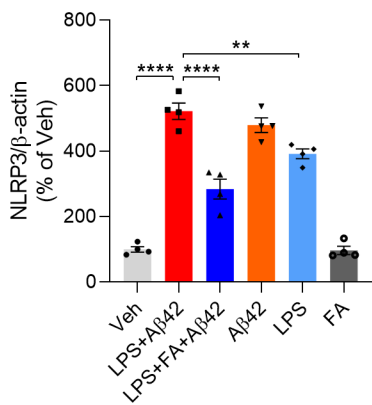

**c**

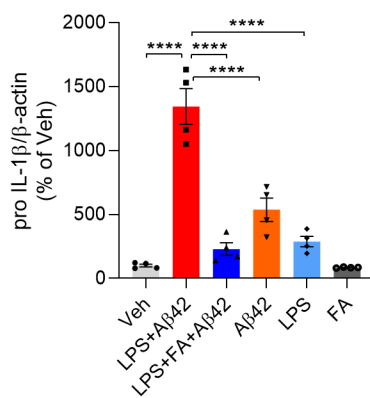

**d**

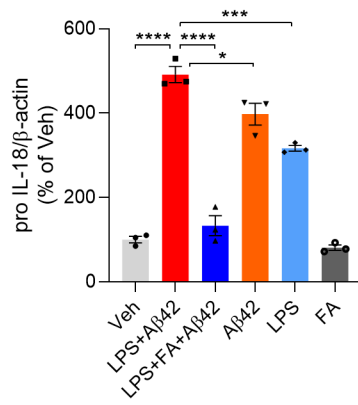

**Suppl. Figure 5. Flufenamic acid attenuates A $\beta$ 42-induced inflammasome activation in LPS-primed microglia.** Mouse primary microglia cells were primed with LPS (10 ng/ml) for 3 h, and washed with serum-free DMEM. LPS-primed microglia were stimulated with A $\beta$ 42 (4  $\mu$ M) for 24 h or treated with FA (1 $\mu$ m) for 1 h before A $\beta$ 42 exposure. **(a)** Immunoblot analysis of NLRP3, pro IL-1 $\beta$ , pro IL-18 and  $\beta$ -actin in whole cells lysate. **(b-d)** Densitometric quantification of immunoblots bands. All experiments were performed at least three independent times and representative figures are shown.  $\beta$ -actin was used as loading control. Data are presented as mean  $\pm$  SEM and data were analyzed by one-way ANOVA Tukey's multiple comparisons test. \* $p$  < 0.05, \*\* $p$  < 0.01, \*\*\* $p$  < 0.001, and \*\*\*\* $p$  < 0.0001.



**Suppl. Figure 6. Flufenamic acid alleviates AD pathology by regulating microglial activation.** PLX3397 was formulated in chow (300mg/kg) and treated to 6 months-old ADLP<sup>A<sup>P</sup>T</sup> for 3 months. Post one month from starting chow treatment, FA or saline was i.p. injected daily. **(a and b)** Hippocampus of mice were immunostained with Iba1. n= 8 for ADLP<sup>WT</sup>+Saline, n=3 for ADLP<sup>A<sup>P</sup>T</sup>+saline, n=4 for ADLP<sup>A<sup>P</sup>T</sup>+FA, n= 7 for ADLP<sup>A<sup>P</sup>T</sup>+PLX+Saline and ADLP<sup>A<sup>P</sup>T</sup>+PLX+FA. % of area measured as mean ± SEM. Data were analyzed by one-way ANOVA Tukey's multiple comparisons test. Scale bar: 100µm. **(c)** Evaluation of cognitive function by Y-maze task. Alternation rates of mice were presented as mean ± SEM. n=5 for ADLP<sup>WT</sup>+saline, n=6 for ADLP<sup>A<sup>P</sup>T</sup>+PLX+Saline and ADLP<sup>A<sup>P</sup>T</sup>+PLX+FA. **(d and e)** Hippocampus was immunostained with biotin-4G8 antibody against Aβ (d) and quantified by percentage of area (e). n=7 for ADLP<sup>A<sup>P</sup>T</sup>+PLX+Saline and ADLP<sup>A<sup>P</sup>T</sup>+PLX+FA. **(f and g)** Phosphorylated tau (Ser202/Thr205) were detected with AT8 antibody (f), and quantified by percentage of area (g). n=6 for ADLP<sup>A<sup>P</sup>T</sup>+PLX+Saline and n=7 for ADLP<sup>A<sup>P</sup>T</sup>+PLX+FA. Data were analyzed by one-way ANOVA Tukey's multiple comparisons test. \*p < 0.05, \*\*\*p < 0.001 and \*\*\*\*p < 0.0001.

**Suppl. Video 1. Video file showing mitochondria-labeled (green) primary microglia in vehicle condition. Scale bar, 10 $\mu$ m.**

**Suppl. Video 2. Video file showing mitochondria-labeled (green) primary microglia in LPS+A $\beta$  condition. Asterisk indicates microglia that show strong mitochondrial fission. Scale bar, 10 $\mu$ m.**

**Suppl. Video 3. Video file showing mitochondria-labeled (green) primary microglia in LPS+Bay+A $\beta$  condition. Scale bar, 20 $\mu$ m.**
